# Supplementary material
Source: PubMed Central journal article supplement (PMC5125868)

**FIGURE 1.**

**A**

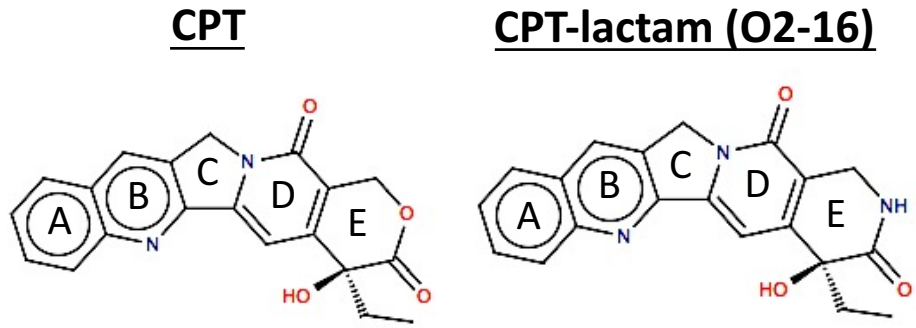

**B**

**Dose Response for Cell-Based FqRET Vif Multimerization Screen**

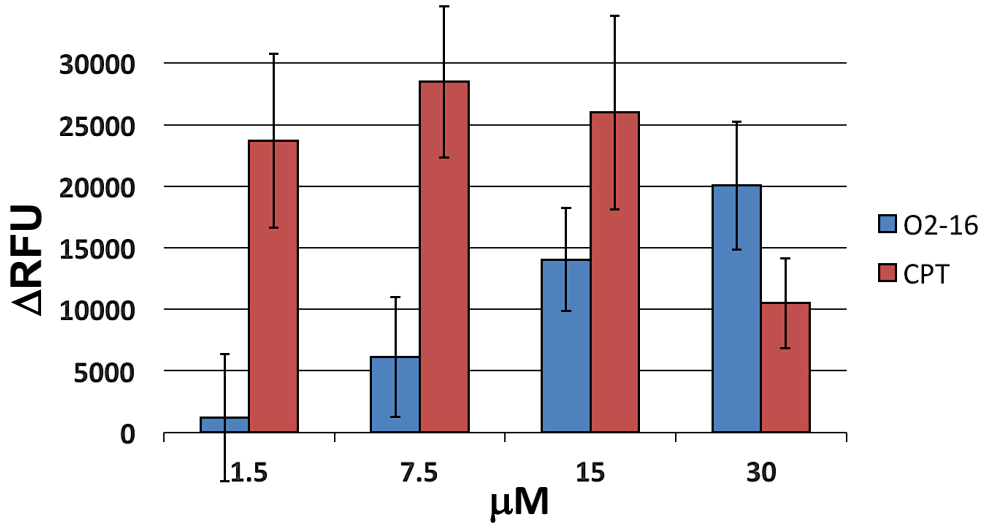

**C**

**Dose Response for Vif-Dependent A3G-mCherry Degradation Screen**

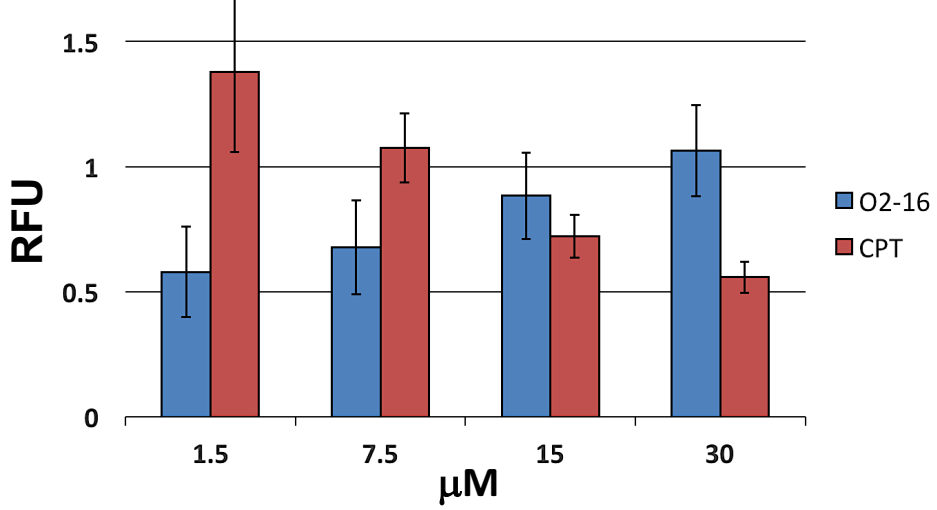

**FIGURE 2.**

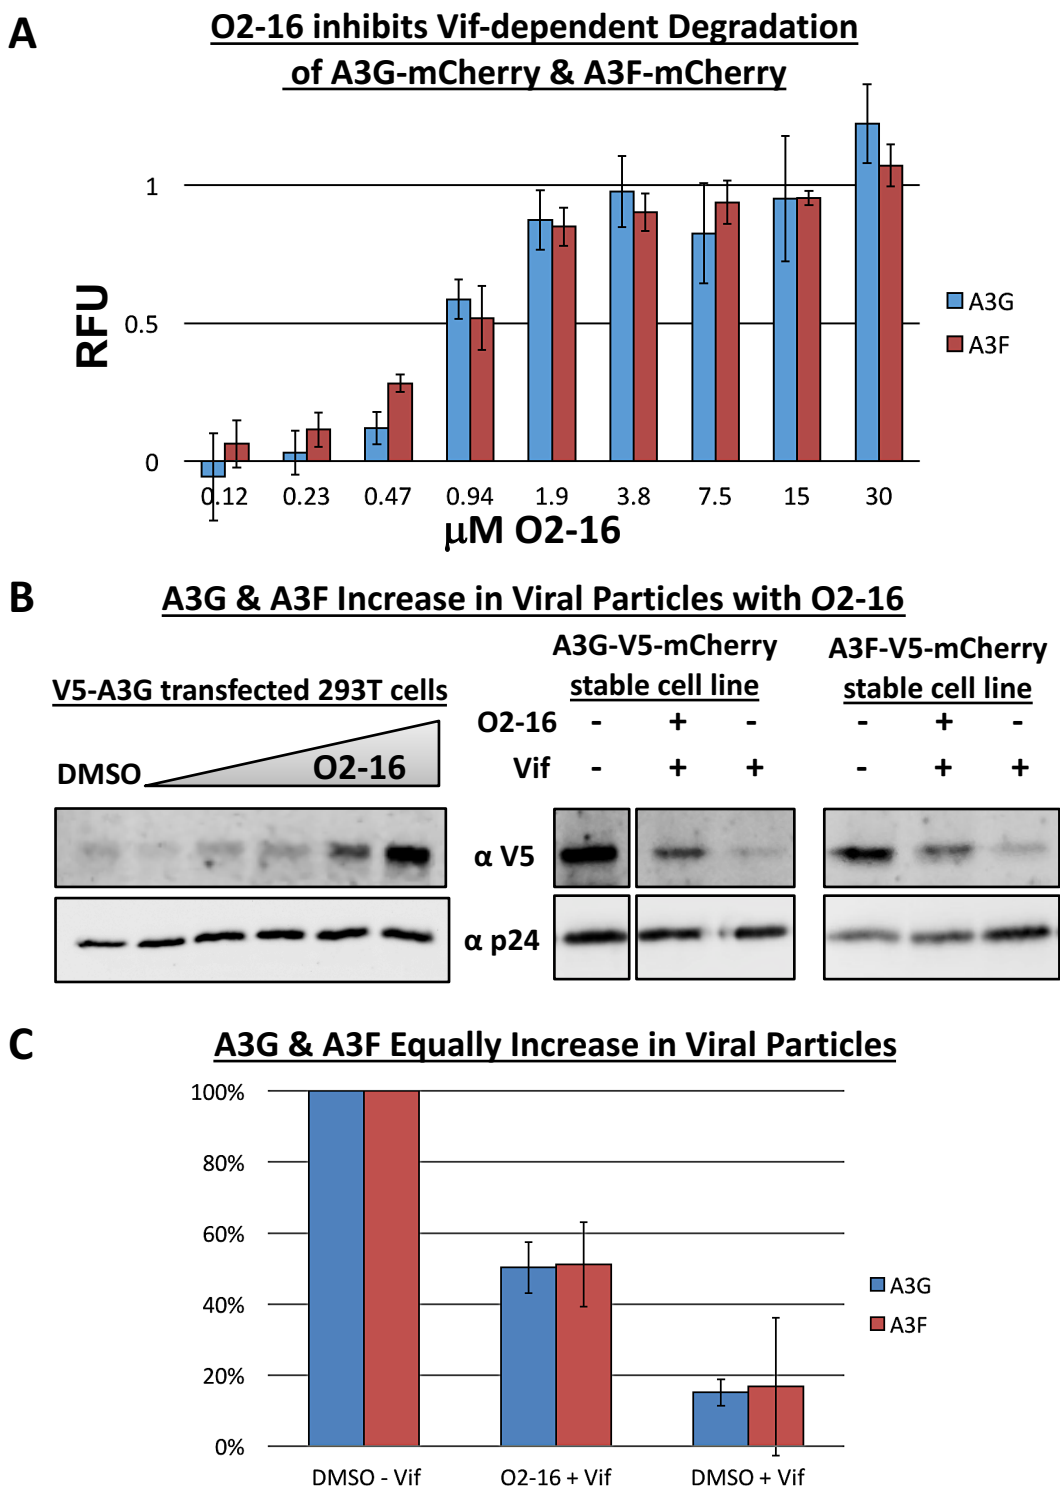

**FIGURE 3.**

**A** CEM-SS A3.01

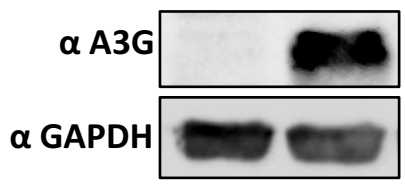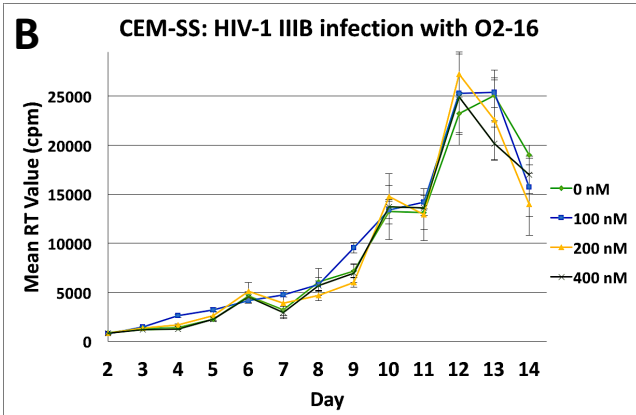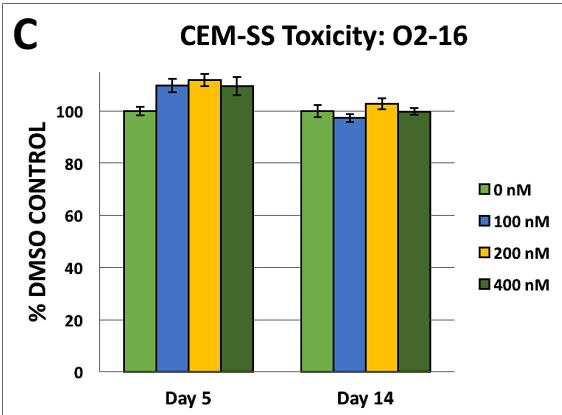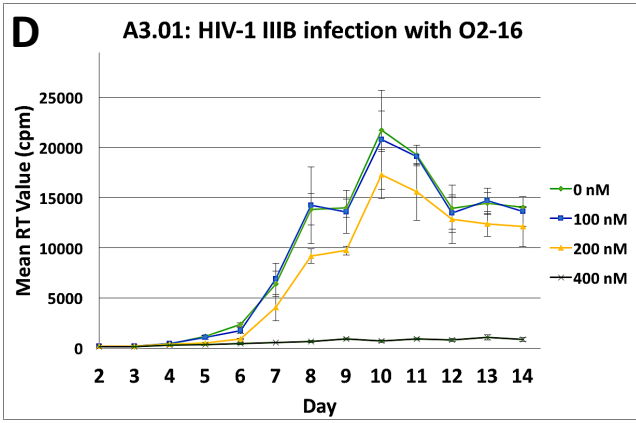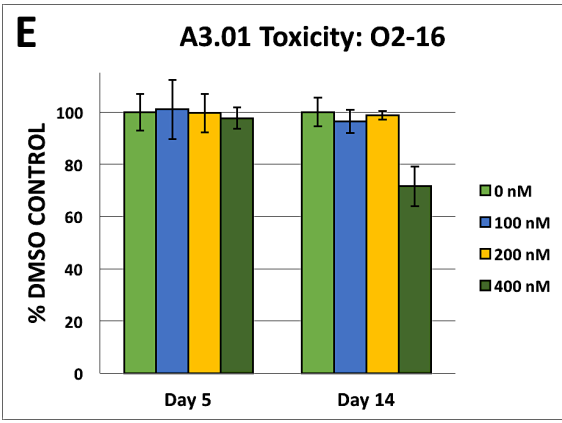

**FIGURE 4.**

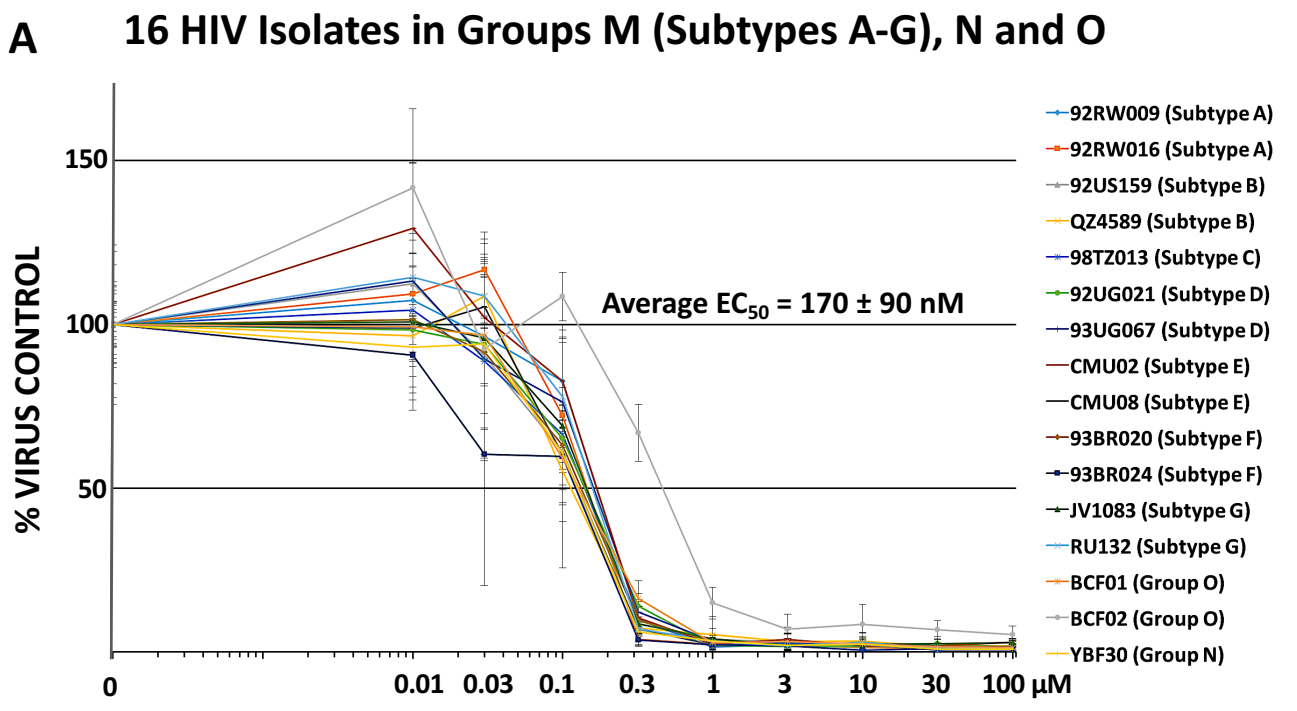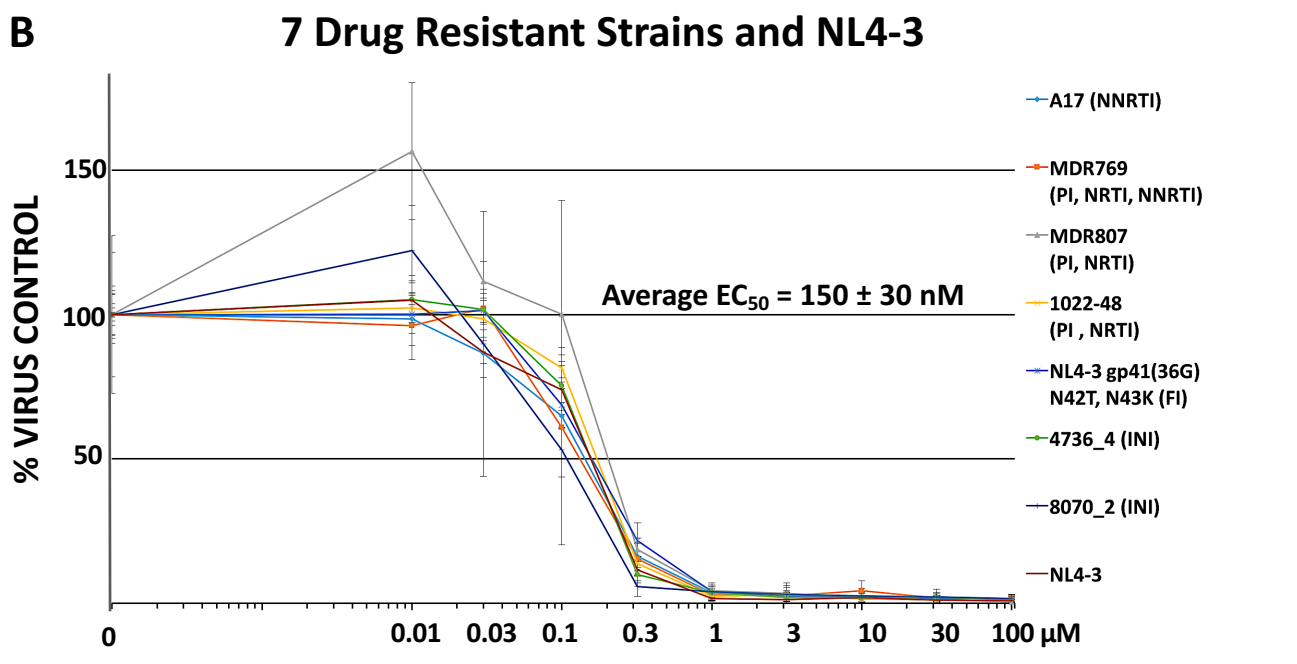

**FIGURE 5.**

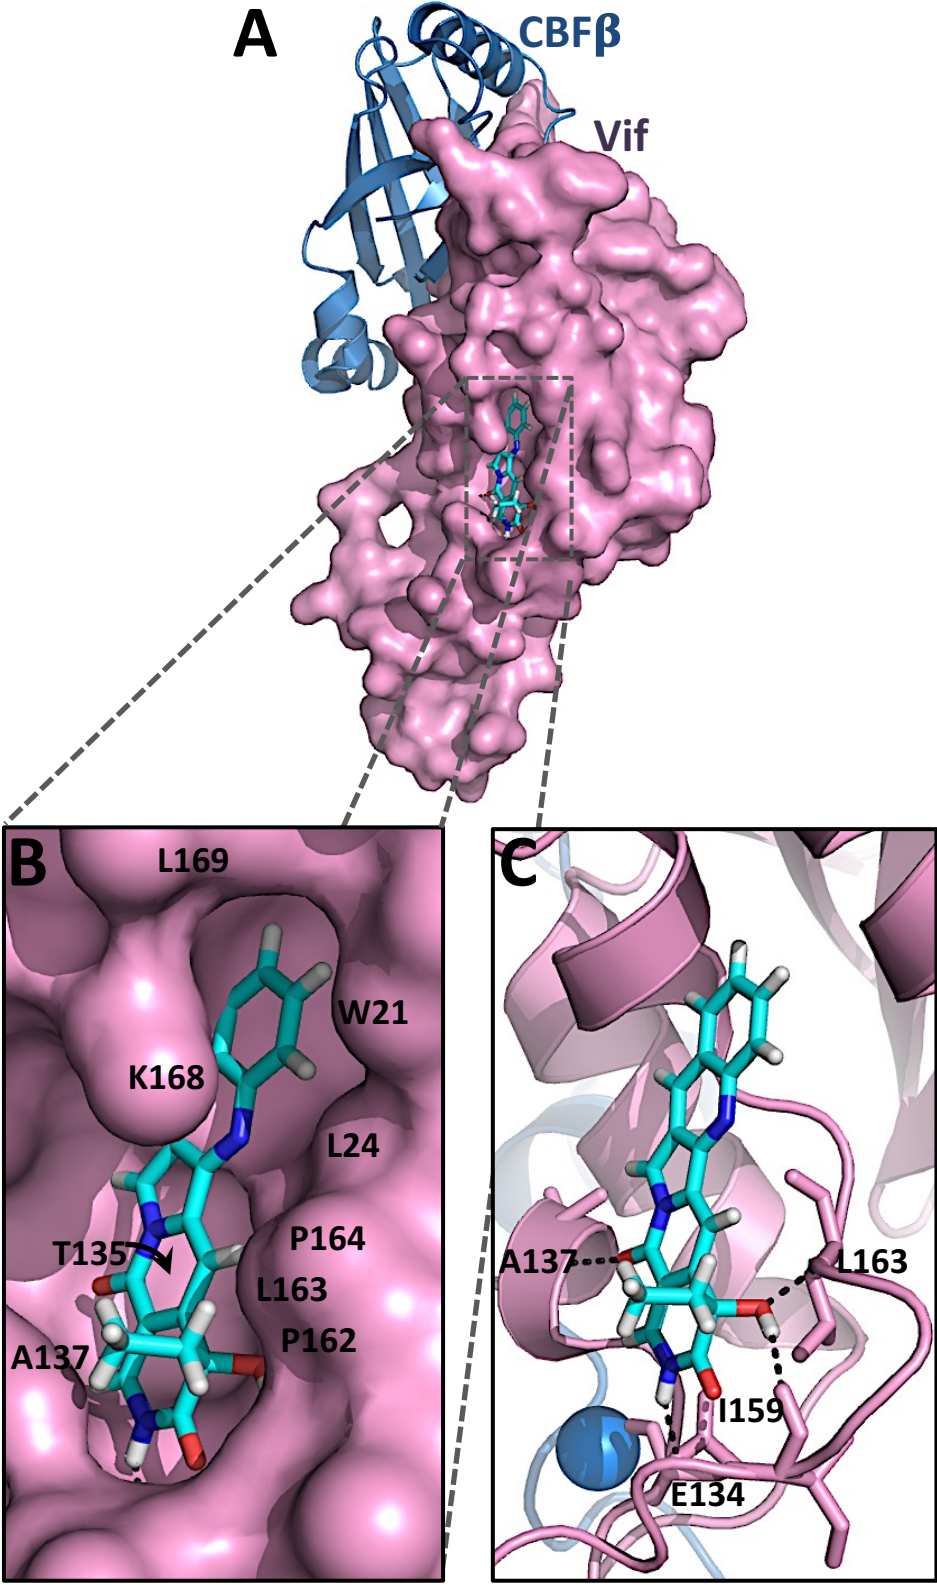

Supplement: NIHMS829751-supplement-1.pdf [file NIHMS829751-supplement-1.pdf]
